# Supplementary material for: “Into and Out of” the Qinghai‐Tibet Plateau and the Himalayas: Centers of origin and diversification across five clades of Eurasian montane and alpine passerine birds
Source: PubMed Central journal article supplement (PMC7487248; doi:10.1002/ece3.6615), 2020-08-04

**'Into and Out of' the Qinghai-Tibet Plateau and the Himalayas: centers of origin and diversification compared across five clades of Eurasian montane and alpine passerine birds**

Martin Päckert, Adrien Favre, Jan Schnitzler, Jochen Martens, Yue-Hua Sun  
Dieter Thomas Tietze, Frank Hailer, Ingo Michalak, Patrick Strutzenberger

**Figure S4**

Ancestral range reconstruction fitting the DEC model to a time-calibrated tree of Passeroidea (275 ingroup species). The time-calibrated phylogenetic tree was generated in BEAST, using eight calibration points (the fossils). The biogeographic analysis included a total of eight areas; per-area probabilities shown for ancestral ranges; outgroup *Bombycilla*: Holarctic distribution of the genus areas A= *B. cedrorum*; BG= *B. garrulus* + *B. japonica*)

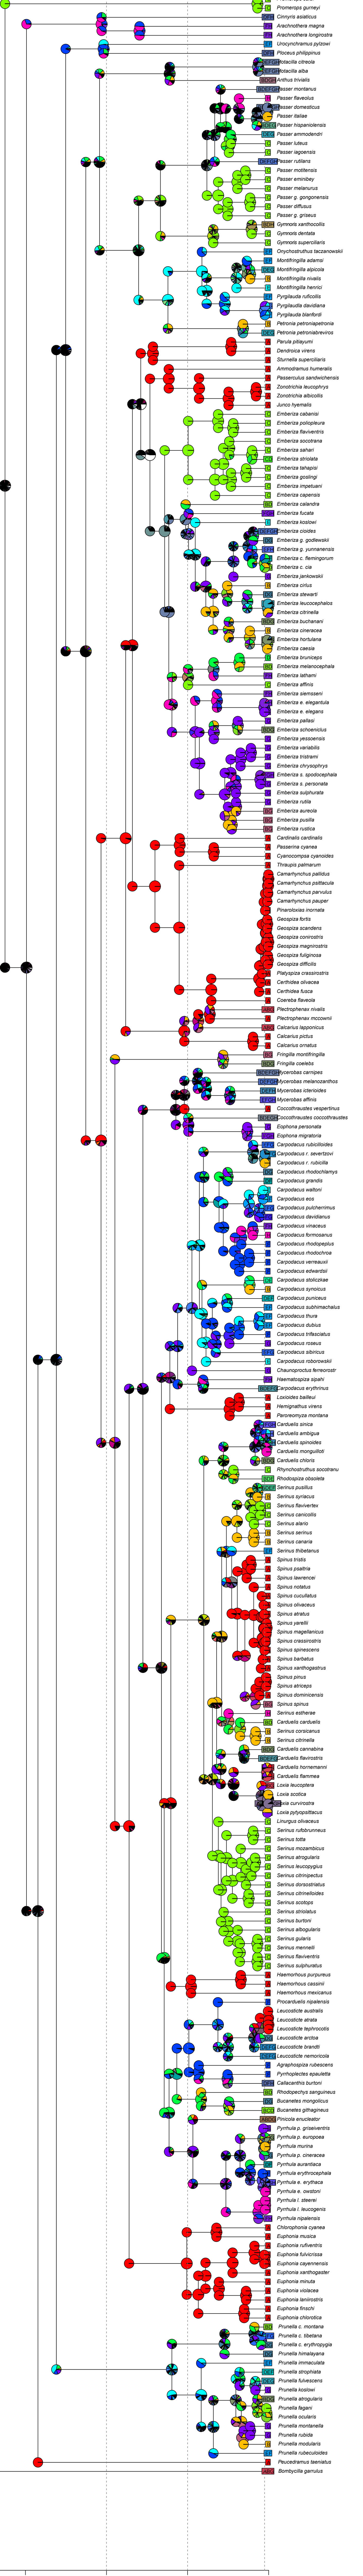

Supplement: ECE3-10-9283-s004.pdf [file ECE3-10-9283-s004.pdf]
